# Supplementary material
Source: Springer Nature journal article supplement (https://www.springermedizin.de/resource/supplementary/12879_2014_4003_MOESM1_ESM.pdf/9446790)

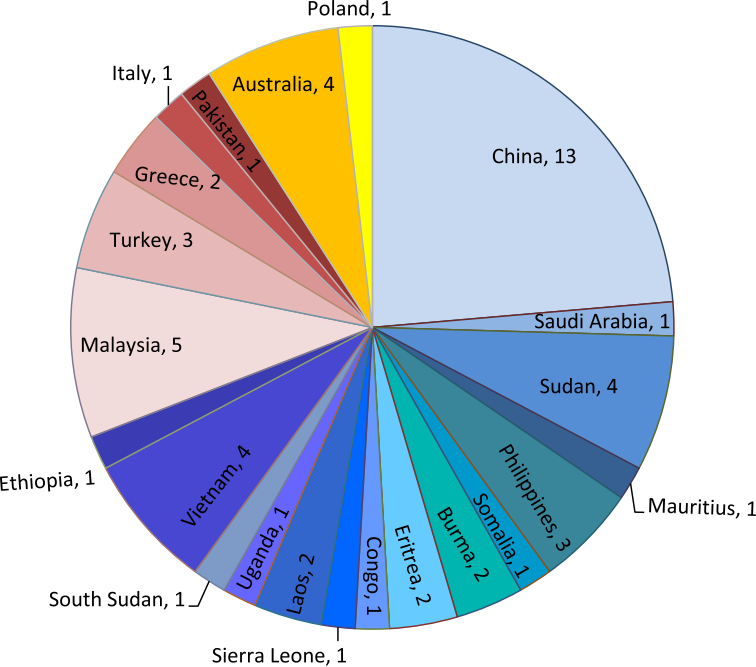

### Figure Legend

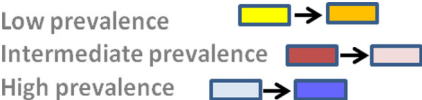

Supplement: MOESM1 [file 9446790]
